## Selective IgA<sub>2</sub> deficiency in a patient with small intestinal Crohn's disease

Pablo Canales-Herrerias<sup>1,2</sup>, Yolanda Garcia-Carmona<sup>1</sup>, Hadar Meringer<sup>1,2</sup>, Gustavo Martinez-Delgado<sup>1,2</sup>, Michael Tankelevich<sup>1,2</sup>, Jean-Frederic Colombel<sup>1,2</sup>, Charlotte Cunningham-Rundles<sup>1</sup>, Andrea Cerutti<sup>1,3,4</sup>, Saurabh Mehandru<sup>1,2</sup>

<sup>1</sup>Precision Immunology Institute, Icahn School of Medicine at Mount Sinai, New York, NY, USA. <sup>2</sup>Henry D. Janowitz Division of Gastroenterology, Department of Medicine, Icahn School of Medicine at Mount Sinai, New York, NY, USA. <sup>3</sup>Translational Clinical Research Program, Hospital del Mar Medical Research Institute (IMIM), Barcelona, Spain. <sup>4</sup>Catalan Institute for Research and Advanced Studies (ICREA), Barcelona, Spain.

Address correspondence to: saurabh.mehandru@mssm.edu or aceutti@imim.es

### Abstract

The human IgA response is composed of two structurally different subclasses termed IgA<sub>1</sub> and IgA<sub>2</sub>. Compared to IgA<sub>1</sub>, IgA<sub>2</sub> has a shorter hinge region, which makes it more resistant to bacterial proteases. IgA<sub>1</sub> is produced both systemically and in mucosal surfaces, whereas IgA<sub>2</sub> is mostly confined to the intestines. While the overall IgA response is known to be involved in intestinal homeostasis, the specific contribution of IgA<sub>1</sub> and IgA<sub>2</sub> remains largely unknown (Chen 2020). Selective IgA deficiency (SIgAD) is the most prevalent primary immune deficiency. About half of SIgAD cases are associated with heterogeneous but generally mild clinical manifestations. Anecdotal evidence of IgA<sub>2</sub> deficiency is available (van Loghem 1983, Ozawa 1986, Engström 1990), however no associations with clinical manifestations have been reported.

Here, we describe the occurrence of a selective IgA<sub>2</sub> deficiency in a patient (CD068) with small intestinal Crohn's disease (CD). The patient had undetectable IgA<sub>2</sub><sup>+</sup> cells and secreted IgA<sub>2</sub> antibody in both intestine and circulation. Among other features, patient CD068 presented with duodenal and ileal inflammation. To our knowledge, this is the first case of IgA<sub>2</sub> deficiency with a potential link to IBD, which might shed new insights into potential IgA<sub>2</sub>-specific functions.

### Results

Small intestinal (ileal) and colonic biopsies were obtained from patient CD068 (male, 36-40 y/o) with history of duodenal, ileal, and perianal Crohn's Disease (CD). A cohort of healthy donors (n=22) and patients with IBD (n=40) served as controls (Tables S1-S2). Mucosal mononuclear cells and peripheral blood mononuclear cells (PBMCs) were characterized by flow cytometry (Figure 1A).

A complete absence of IgA<sub>2</sub><sup>+</sup> plasma cells (PCs) was noted in the colon, ileum and peripheral blood of CD068, while IgA<sub>1</sub><sup>+</sup> PCs were present throughout (Figures 1A, S2). Further, among CD19<sup>+</sup>IgD<sup>-</sup>IgM<sup>-</sup>CD27<sup>+</sup> memory B cells, IgA<sub>2</sub>-switched cells were absent in the ileum, colon and PBMCs of CD068 (Figure 1B).

To compare PCs from CD068 with those from additional IBD patients, we obtained colonic and ileal biopsies from a cohort of 8 UC patients, 6 CD patients, and 19 healthy donors (HDs), and performed flow cytometry on isolated cells (Figure 1C). When intestinal PC populations were analyzed, the frequency of ileal and colonic IgA<sub>1</sub><sup>+</sup> PCs was comparable in IBD patients and HDs. Similarly, the frequency of IgA<sub>1</sub><sup>+</sup> PCs from CD068 fell within the interval estimate for HDs (3 standard deviations around the mean). Conversely, a significant loss of IgA<sub>2</sub><sup>+</sup> cells was detected in inflamed colonic areas from UC patients compared to HDs, which suggests that IgA<sub>2</sub> could have subclass-specific homeostatic functions. Although not significant, there was a trend for the loss of IgA<sub>2</sub><sup>+</sup> cells in inflamed ileal tissues from CD patients. Together with the loss of IgA<sub>2</sub><sup>+</sup> PCs, we found an expansion of non-IgA PCs in the same inflamed areas of ileum and colon of IBD patients compared to HDs, as suggested by previous reports (Castro-Dopico 2019, Uzzan 2022). The frequency of IgA<sup>-</sup> PCs in CD068 was above the HD interval estimate in the ileum, consistent with the presence of inflammation in this tissue. Interestingly, a strong increase of IgA<sup>-</sup> PCs was also seen in the uninfamed colon of CD068.

To confirm the loss of IgA<sub>2</sub><sup>+</sup> cells in the gut mucosa, we used tissue immunofluorescence (IF) to stain for IgA<sub>1</sub><sup>+</sup> and IgA<sub>2</sub><sup>+</sup> cells. We did not find any IgA<sub>2</sub><sup>+</sup> cells in the intestinal mucosa of CD068, while IgA<sub>1</sub><sup>+</sup> cells were readily detected (Figure 1D). To exclude the possibility of lack of detection by our primary antibody, we stained tissue for IgA<sub>1</sub> and total IgA, and found that all IgA<sup>+</sup> cells were also IgA<sub>1</sub><sup>+</sup> in CD068. Next, we asked whether secreted antibodies lacked IgA<sub>2</sub> in patient CD068 and measured the concentration of serum IgA<sub>2</sub> by ELISA. While IgA<sub>2</sub> could be readily measured in HDs, no detectable IgA<sub>2</sub> was found in patient CD068 (Figure 1E). In addition, we compared circulating IgA<sub>2</sub> from CD068 with a cohort of 39 IBD patients (27 CD and 12 UC), and found detectable IgA<sub>2</sub> in the entire cohort, except CD068. Considering that IgA<sub>2</sub> is mostly produced in the intestinal mucosa, we also measured gut IgA<sub>2</sub> secretion. For this purpose, we used a biopsy

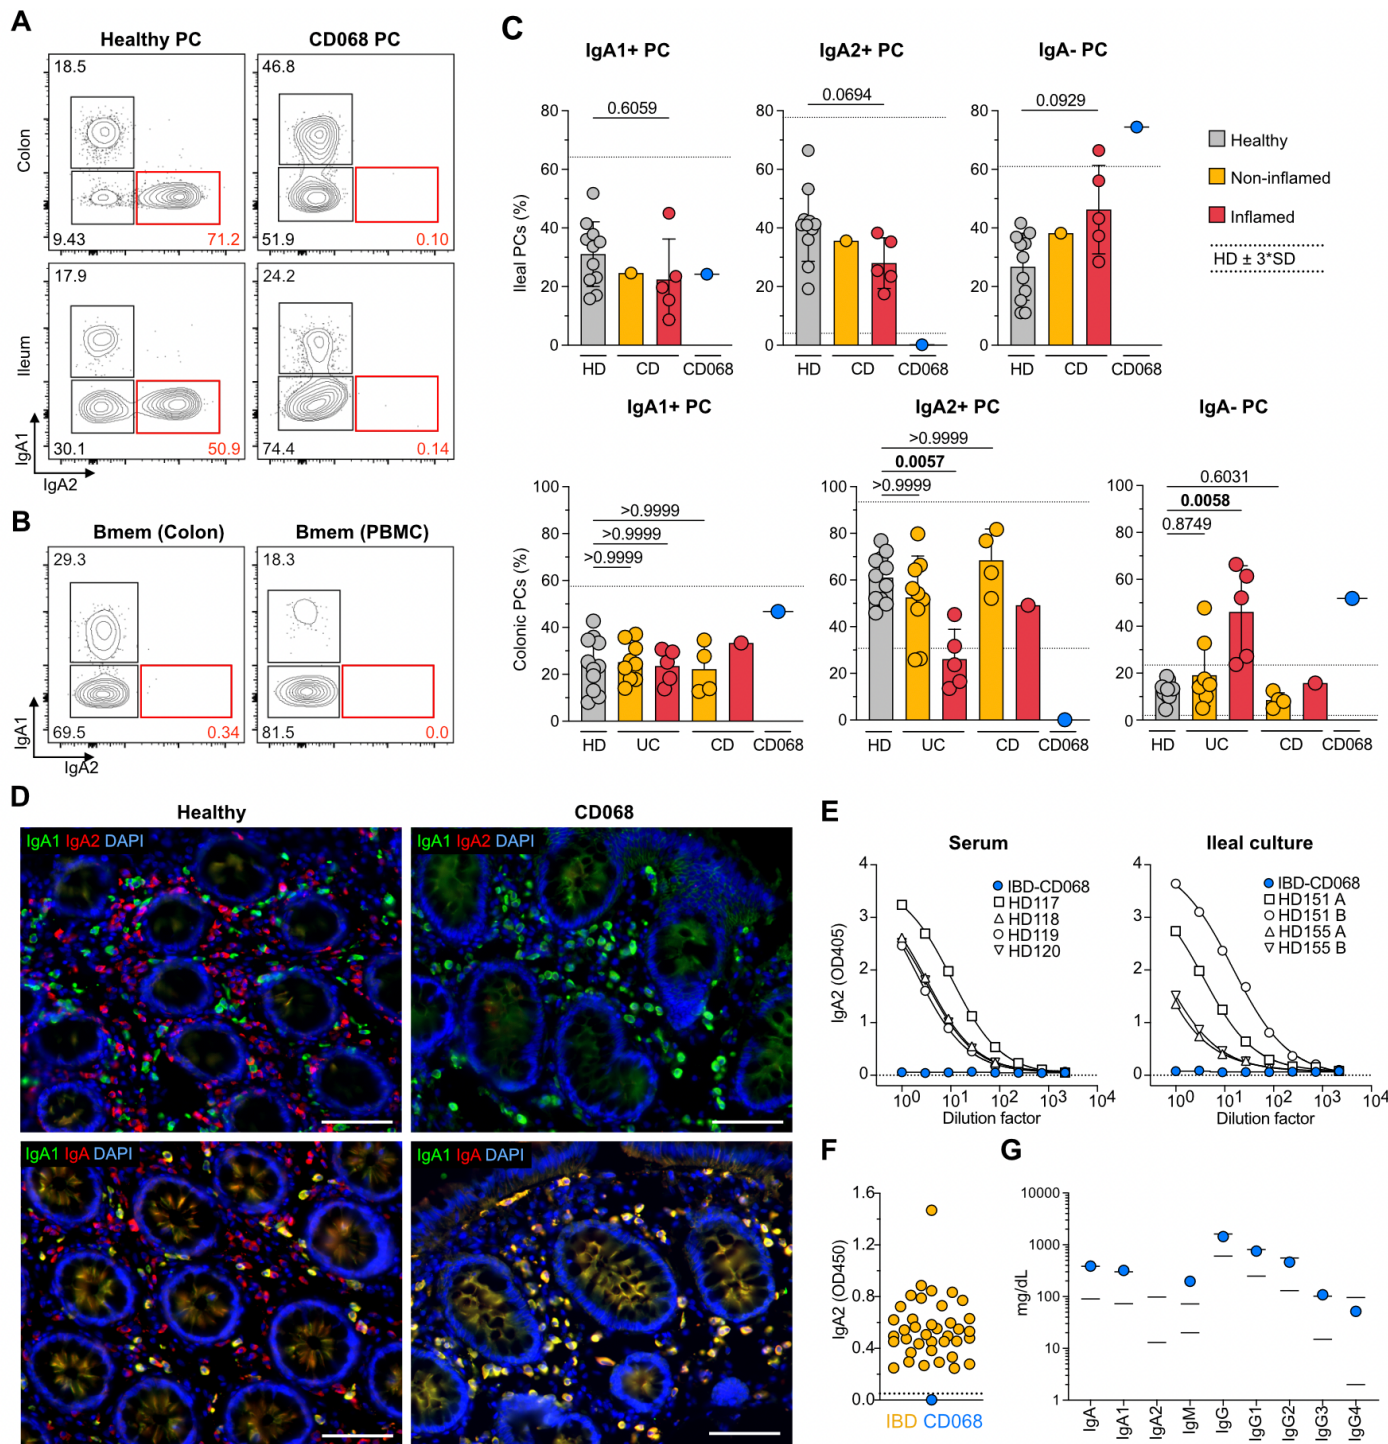

**Figure 1. Selective IgA<sub>2</sub> deficiency in a patient with small intestinal CD.** (A) Flow cytometric staining of IgA<sub>1</sub> and IgA<sub>2</sub> on intestinal lamina propria and circulating PCs from a representative control HD (left) and IBD patient CD068 (right). (B) Flow cytometric staining of IgA<sub>1</sub> and IgA<sub>2</sub> on memory B cells from colonic lamina propria (left) and peripheral blood (right) from IBD patient CD068. (C) Frequency of PCs from the mucosa of control HDs (gray), noninflamed IBD patients (yellow), inflamed IBD patients (red), and IBD patient CD068 (blue symbol). Ileal mucosal samples are represented in top panels and Colonic mucosal samples in lower panels. Mean and SD are shown. Interval estimate calculated as 3 X SD around the mean of control HDs. (D) Immunofluorescence staining of IgA<sub>1</sub> and IgA<sub>2</sub> (top) as well as IgA<sub>1</sub> and total IgA (bottom) from a representative control HD (left) and IBD patient CD068 (right). (E) ELISA of secreted IgA<sub>2</sub> from serum and ileal tissue culture supernatant of control HDs and IBD patient CD068 (blue symbol). (F) ELISA of secreted IgA<sub>2</sub> from plasma of UC and CD patients (yellow), and IBD patient CD068 (blue symbol). (G) Nephelometry of total serum immunoglobulin levels from control HDs (black lines indicate normal range) and IBD patient CD068 (blue symbol).

culture system to harvest tissue-derived antibodies (Mesin 2011). We found no detectable IgA<sub>2</sub> in biopsy culture supernatant from patient CD068, while we could detect it in biopsy culture supernatant from 4 HD samples. Furthermore, we measured the IgA coating profile of fecal microbiota, and found no IgA<sub>2</sub>-coated bacteria in CD068, while IgA<sub>2</sub> coating was readily detected in HD microbiota (Figure S1). To establish if this phenotype was specific to IgA<sub>2</sub>, we measured each antibody class and subclass in the serum from patient CD068. In contrast to IgA<sub>2</sub>, which remained undetectable, the other antibody isotypes were detectable and comparable to the levels seen in HDs. Interestingly, circulating IgM from patient CD068 was more abundant than IgM from HDs, suggesting that the loss of IgA<sub>2</sub> was compensated for by IgM.

Next, we examined whether B cells from patient CD068 did not produce IgA<sub>2</sub> due to an intrinsic B cell defect and stimulated the patient's PBMCs *in vitro* for 10 days using CD40L and IL-2. While HDs induced both IgA<sub>1</sub><sup>+</sup> and IgA<sub>2</sub><sup>+</sup> PCs, no IgA<sub>2</sub><sup>+</sup> PCs were induced by patient CD068 (Figure S2). Furthermore, a 407 gene panel for immune deficiency was used to examine genetic alterations (data not shown). No homozygous alterations were noted. The patient was found to have 7 variants of unknown significance in *AP3B1*, *C7*, *CCBE1*, *ITGB2*, *SAMD9*, *TCF3*, and *USB1*, and one pathogenic recessive mutation in *TCIRG1* (associated with autosomal recessive osteopetrosis).

## Discussion

IgA is thought to be central to the maintenance of intestinal homeostasis and prevention of inflammation. Selective IgA deficiency (SIgAD) is often asymptomatic. Nevertheless, the prevalence of inflammatory bowel disease, especially CD, is higher among the SIgAD population (Ludvigsson 2014). Although patient CD068 did not lack IgA<sub>1</sub>, there may be common mechanisms in the pathogenesis of SIgAD and IgA<sub>2</sub>-deficiency-related inflammation, considering that IgA<sub>2</sub> is particularly abundant in the intestine.

Selective loss of IgA<sub>1</sub> associated with loss of IgG<sub>2</sub>, IgG<sub>4</sub> and/or IgE was described in a few patients due to large homozygous gene deletions in the *IgCH* gene (van Loghem 1983). Loss of IgA<sub>2</sub> in serum was first reported in two members of one family (Zegers 1986); this isotype was also not expressed on lymphocytes even after B cell activation *in vitro*. Using genetic marker (Gm) allotyping, deletion of the  $\alpha 2$  gene was proposed (Zegers 1986), however no gross deletions or rearrangements could be detected in these subjects (Oliviero 1986). Loss of IgA<sub>2</sub> by gene deletion was later documented in one patient, who also had loss of IgG<sub>2</sub> and IgG<sub>4</sub> due to homozygous deletions of the  $\alpha 2$  and  $\alpha 4$  genes (Bottaro 1989, Engstrom 1990). Patient CD068 had normal expression of IgG subclasses confirming no loss of these genes and suggesting a more restricted genetic loss or another mechanism for lack of IgA<sub>2</sub>.

Although the functional differences between IgA<sub>1</sub> and IgA<sub>2</sub> remain unclear, these IgA subclasses possibly serve unique roles in the gut mucosa. For example, given its higher resistance to bacterial proteolysis, IgA<sub>2</sub> may be particularly important for preventing luminal microbes from reaching the epithelium, in a process called immune exclusion. Should this be the case, the lack of IgA<sub>2</sub> could increase the penetration capacity of commensal microbes across the gut epithelium. In support of this idea, a loss of IgA<sub>2</sub><sup>+</sup> PCs in inflamed IBD tissue has been described previously (Kett 1987 & 1988, Boland 2020). The resulting pro-inflammatory environment would favor the induction of IgG<sup>+</sup> PCs. Accordingly, an expansion of IgG<sup>+</sup> PCs has been recently described in inflamed IBD tissue (Uzzan, 2022). Of note, IgG released by these pathological PCs would contribute to gut inflammation by delivering FcR-mediated pro-inflammatory signals to myeloid cells (Castro-Dopico 2019).

The small intestine is the largest reservoir of IgA<sup>+</sup> PCs in the body (Bunker 2015) and contains a bacterial community that is more heavily coated by IgA than in the large intestine (Sterlin 2019). These properties could render the small intestine more susceptible to tissue injury in the context of impaired IgA production. Consistent with this possibility, mouse IgA deficiency has been linked to spontaneous inflammation of the small intestine (Nagaishi 2022); this inflammation was associated with dysbiosis of the local microbiota, which encompassed expansion of segmented filamentous bacteria. Similarly, human IgA<sub>2</sub> deficiency might unbalance the composition and/or function of the gut microbiota, leaving the small intestine particularly susceptible to inflammation. Although a causal relationship between the lack of IgA<sub>2</sub> and CD remains unproven, our study shows novel evidence that documents an association between IgA<sub>2</sub> deficiency (confirmed by multiple, orthogonal assays) and small bowel CD with atypical features (duodenal inflammation). Further studies aimed at dissecting the specific function and reactivity of gut IgA<sub>1</sub> and IgA<sub>2</sub> could lead to a better understanding of the contribution of IgA subclasses to IBD pathogenesis.

## Author contributions

PC, SH and AC designed research. PC, YG, HM and GM performed research. PC analyzed data. PC, SM and AC wrote the manuscript.

## Acknowledgments

We thank the patients who participated in the study. This work was supported by the following grants: Anonymous Donor (SM and JFC), NIH/NIDDK R01 123749 (SM).

## Materials and Methods

### *Patients*

Patients were recruited between 2019 and 2022 in the Inflammatory Bowel Disease Center, the Gastroenterology Department and the Digestive Endoscopy Unit at Mount Sinai Hospital, NY. In accordance with the institutional review board, the protocol was approved and informed consent was obtained from all patients. Detailed patient characteristics are included in Table S1 and S2. Patients enrolled in the study were asked to donate intestinal biopsies and blood. Biopsies were collected during colonoscopies planned for regular care.

Patient CD068 (male, 36-40 y/o) had abdominal pain and bleeding at age 16-20 and diagnosed with stricturing Crohn's disease. He had no medical history of respiratory tract infections, illnesses or hospitalizations. One parent has a history of pemphigus vulgaris; there was no history of consanguinity.

All patient IDs are internal to our laboratory and are used only for purposes of this research project.

### *Intestinal tissue processing*

During colonoscopy, 8-12 biopsies from non-inflamed and/or inflamed regions of the descending colon and terminal ileum were collected with forceps directly into ice-cold RPMI and transported to the laboratory. All biopsies were processed within 3h of collection. Two consecutive rounds of dissociation were performed to remove the epithelium, each consisting of 20 min incubation (37°C, 215rpm) in 10ml HBSS (no calcium and magnesium) (Gibco) containing 5mM EDTA (Invitrogen), 100mM Hepes (Lonza) and 10% FBS, followed by 30s vortex and washing with HBSS. Biopsies were then transferred into 10ml of digestion media, made of RPMI (Gibco) containing 0.5mg/ml Collagenase IV (Sigma-Aldrich), 0.1mg/ml DNase-1 (Roche) and 1% FBS, and were incubated for 40 min (37°C, 215rpm). Biopsies were mechanically disrupted using a syringe needle, before two filtering and washing steps (RPMI) through 100µm and 40µm cell strainers. The single cell suspension was centrifuged (400G, 10 min) and resuspended in RPMI for downstream analysis.

### *Blood processing*

Blood was drawn in EDTA tubes, transported to the lab at room temperature, and processed within 3h of collection. Blood was diluted with PBS 1X (Gibco) and gently overlaid on lymphocyte separation medium (MP Biomedicals). After centrifugation, mononuclear cells were recovered and washed two times with PBS. Serum was collected and immediately stored at -80°C.

### *Flow cytometry*

After isolation from tissue, cells were incubated for 20min at 4°C in PBS containing a mix of staining antibodies. Cells were then

washed with PBS and fixed using PBS with 2% formaldehyde (ChemCruz) for 20 min, before washing with PBS. Cells were resuspended in PBS and acquired within 24h using LSR Fortessa (BD Bioscience). Data was analyzed using FlowJo v10 (FlowJo). A list of antibodies is displayed in Table S3.

### *Tissue immunofluorescence*

Immunofluorescence staining was performed on formalin-fixed, paraffin-embedded intestinal tissue sections of 5µm thickness. Samples were deparaffinized through two 5 min xylene baths, followed by consecutive washes in solutions of decreasing concentration of ethanol in distilled water (100, 90, 80 and 70%), and two 5 min baths in PBS. Antigen retrieval was done using Dako antigen retrieval solution (Dako) and 15 min heating in pressure cooker, before washing 3x with PBS. Samples were blocked using 10% goat serum (Life technologies) or donkey serum (Southern Biotech) for 1h at room temperature. Primary antibodies were then added to the tissue in serum, and samples were incubated overnight at 4°C. Slides were washed with PBS, before adding secondary antibodies and DAPI, which were incubated for 1h at room temperature. Slides were washed with PBS and mounted using Fluoromount G (Electron Microscopy Sciences). A list of antibodies is included in Table S3. Tissue was visualized using a Nikon Eclipse Ni microscope and a Nikon DS-Qi2 camera.

### *ELISA*

Maxisorp ELISA plates (Fischer scientific) were coated with anti-human IgA<sub>2</sub> antibody (Miltenyi) 1µg/ml in Bicarbonate buffer, and incubated for 1.5h at room temperature. After washing with PBS-Tween (PBST) (Sigma), blocking was done using PBST with 3% BSA during 1.5h at room temperature. Before being added to the plate, plasma and serum samples were diluted 1:100 in PBST-BSA, while tissue supernatant was diluted 1:3 in PBST-BSA. Serial dilutions (1:3) were made through the plate, and samples were incubated overnight at 4°C. Plates were washed 3x with PBST, and secondary anti- IgA<sub>2</sub>-HRP (Southern Biotech) antibody was added and incubated 1.5h at room temperature. Finally, plates were washed with PBST and TMB substrate was added. Absorbance was measured at 450nm using a plate reader.

### *Tissue culture*

During colonoscopy, biopsies were taken with forceps directly into ice-cold RPMI with 10x Antibiotic-Antimycotic (RPMI-AA) (Gibco), and transported to the lab on ice. Under sterile conditions, biopsies were rinsed on a cell strainer using RPMI-AA 10x. Biopsies were placed in pairs into 48-well plates with 1 ml RPMI-AA 10x per well, and kept from this point at 37°C with 5% CO<sub>2</sub>. Culture medium was replaced every 2 days using pre-warmed RPMI-AA 2x. Recovered

culture medium was centrifuged 10min at 14000G and stored at -80°C.

#### *Bacterial flow cytometry*

Fecal pellets were dissolved in PBS at 100 mg/ml by vortexing. Fecal slurry was centrifuged 10min at 50G to remove large particles. Supernatant was filtered through a 40nm cell strainer and cells were then washed by centrifugation at 9000G and resuspension in washing buffer (PBS, 1% BSA, 2mM EDTA). Blocking was done using PBS +1% BSA +20% mouse serum, for 20min at 4°C. Cells were stained with anti-human IgA2-PE and anti-human IgA-APC for 30min at 4°C, before washing three times with washing buffer. Samples were stained with SYBR green before analysis by flow cytometry.

#### *Immune globulin measurements*

For patient CD068, serum immune globulins were IgG=1,435 (nl 603 - 1,613 mg/dl); IgA=387 (nl 90-386 mg/dl); and IgM= 197 (l n20 - 172 mg/dl). IgE=13 (6-495IU/ml). In terms of IgG subclasses, IgG1- 753 (248 - 810 mg/dL) IgG2 = 464(130 - 555 mg/dL) IgG3 = 108 (15 - 102 mg/dL); IgG4 = 52 (2 - 96 mg/dl). His IgA1 = 391.6 (73.2 - 301.2 mg/dL) mg /dl, and IgA2 = <0.5 (13.4 - 97.9 mg/dL).

#### *Genetic Primary Immunodeficiency Panel*

A primary immune deficiency panel of 407 genes was obtained with patient's consent (Invitae Corp, San Francisco CA).

#### *In vitro B cell stimulation*

For B cell activation, PBMCs were cultured in RPMI media (Gibco) supplemented with 10% FBS, the presence of CD40L (1µg/ml) (InvivoGen) plus IL-21 (100 ng/ml) (BioLegend) for 10 days. Cells were kept in 24-well plates at 37°C with 5% CO<sub>2</sub>. After 10 days of culture, cells were analyzed by Flow cytometry, as indicated before.

#### **References**

1. Chen K, Magri G, Grasset EK, Cerutti A. Rethinking mucosal antibody responses: IgM, IgG and IgD join IgA. *Nat Rev Immunol.* 2020 Jul;20(7):427-441.
2. van Loghem E, Zegers BJ, Bast EJ, Kater L. Selective deficiency of immunoglobulin A2. *J Clin Invest.* 1983 Dec;72(6):1918-23.
3. Ozawa N, Shimizu M, Imai M, Miyakawa Y, Mayumi M. Selective absence of immunoglobulin A1 or A2 among blood donors and hospital patients. *Transfusion.* 1986 Jan-Feb;26(1):73-6.
4. Engström PE, Norhagen G, Bottaro A, Carbonara AO, Lefranc G, Steinitz M, Söder PO, Smith CI, Hammarström L. Subclass distribution of antigen-specific IgA antibodies in normal donors and individuals with homozygous C alpha 1 or C alpha 2 gene deletions. *J Immunol.* 1990 Jul 1;145(1):109-16.
5. Mesin L, Di Niro R, Thompson KM, Lundin KE, Sollid LM. Long-lived plasma cells from human small intestine biopsies secrete immunoglobulins for many weeks in vitro. *J Immunol.* 2011 Sep 15;187(6):2867-74.
6. Ludvigsson JF, Neovius M, Hammarström L. Association between IgA deficiency & other autoimmune conditions: a population-based matched cohort study. *J Clin Immunol.* 2014 May;34(4):444-51.
7. Chen K, Magri G, Grasset EK, Cerutti A. Rethinking mucosal antibody responses: IgM, IgG and IgD join IgA. *Nat Rev Immunol.* 2020 Jul;20(7):427-441.
8. van Loghem E, Zegers BJ, Bast EJ, Kater L. Selective deficiency of immunoglobulin A2. *J Clin Invest.* 1983 Dec;72(6):1918-23.
9. Ozawa N, Shimizu M, Imai M, Miyakawa Y, Mayumi M. Selective absence of immunoglobulin A1 or A2 among blood donors and hospital patients. *Transfusion.* 1986 Jan-Feb;26(1):73-6.
10. Engström PE, Norhagen G, Bottaro A, Carbonara AO, Lefranc G, Steinitz M, Söder PO, Smith CI, Hammarström L. Subclass distribution of antigen-specific IgA antibodies in normal donors and individuals with homozygous C alpha 1 or C alpha 2 gene deletions. *J Immunol.* 1990 Jul 1;145(1):109-16.
11. Mesin L, Di Niro R, Thompson KM, Lundin KE, Sollid LM. Long-lived plasma cells from human small intestine biopsies secrete immunoglobulins for many weeks in vitro. *J Immunol.* 2011 Sep 15;187(6):2867-74.
12. Ludvigsson JF, Neovius M, Hammarström L. Association between IgA deficiency & other autoimmune conditions: a population-based matched cohort study. *J Clin Immunol.* 2014 May;34(4):444-51.
13. Uzzan M, Martin JC, Mesin L, Livanos AE, Castro-Dopico T, Huang R, Petralia F, Magri G, Kumar S, Zhao Q, Rosenstein AK, Tokuyama M, Sharma K, Ungaro R, Kosoy R, Jha D, Fischer J, Singh H, Keir ME, Ramamoorthi N, Gorman WEO, Cohen BL, Rahman A, Cossarini F, Seki A, Leyre L, Vaquero ST, Gurunathan S, Grasset EK, Losic B, Dubinsky M, Greenstein AJ, Gottlieb Z, Legnani P, George J, Irizar H, Stojmirovic A, Brodmerkel C, Kasarkis A, Sands BE, Furtado G, Lira SA, Tuong ZK, Ko HM, Cerutti A, Elson CO, Clatworthy MR, Merad M, Suárez-Fariñas M, Argmann C, Hackney JA, Victora GD, Randolph GJ, Kenigsberg E, Colombel JF, Mehandru S. Ulcerative colitis is characterized by a plasmablast-skewed humoral response associated with disease activity. *Nat Med.* 2022 Apr;28(4):766-779.
14. Castro-Dopico T, Dennison TW, Ferdinand JR, Mathews RJ, Fleming A, Clift D, Stewart BJ, Jing C, Strongili K, Labzin LI, Monk EJM, Saeb-Parsy K, Bryant CE, Clare S, Parkes M,

- Clatworthy MR. Anti-commensal IgG Drives Intestinal Inflammation and Type 17 Immunity in Ulcerative Colitis. *Immunity*. 2019 Apr 16;50(4):1099-1114.e10.
15. Kett K, Brandtzaeg P. Local IgA subclass alterations in ulcerative colitis and Crohn's disease of the colon. *Gut*. 1987 Aug;28(8):1013-21.
16. Kett K, Brandtzaeg P, Fausa O. J-chain expression is more prominent in immunoglobulin A2 than in immunoglobulin A1 colonic immunocytes and is decreased in both subclasses associated with inflammatory bowel disease. *Gastroenterology*. 1988 Jun;94(6):1419-25.
17. Boland BS, He Z, Tsai MS, Olvera JG, Omilusik KD, Duong HG, Kim ES, Limary AE, Jin W, Milner JJ, Yu B, Patel SA, Louis TL, Tysl T, Kurd NS, Bortnick A, Quezada LK, Kanbar JN, Miralles A, Huylebroeck D, Valasek MA, Dulai PS, Singh S, Lu LF, Bui JD, Murre C, Sandborn WJ, Goldrath AW, Yeo GW, Chang JT. Heterogeneity and clonal relationships of adaptive immune cells in ulcerative colitis revealed by single-cell analyses. *Sci Immunol*. 2020 Aug 21;5(50): eabb4432.
18. Bunker JJ, Flynn TM, Koval JC, Shaw DG, Meisel M, McDonald BD, Ishizuka IE, Dent AL, Wilson PC, Jabri B, Antonopoulos DA, Bendelac A. Innate and Adaptive Humoral Responses Coat Distinct Commensal Bacteria with Immunoglobulin A. *Immunity*. 2015 Sep 15;43(3):541-53.
19. Sterlin D, Fadlallah J, Adams O, Fieschi C, Parizot C, Dorgham K, Rajkumar A, Autaa G, El-Kafsi H, Charuel JL, Juste C, Jönsson F, Candela T, Wardemann H, Aubry A, Capito C, Brisson H, Tresallet C, Cummings RD, Larsen M, Yssel H, von Gunten S, Gorochov G. Human IgA binds a diverse array of commensal bacteria. *J Exp Med*. 2020 Mar 2;217(3):e20181635.
20. Nagaishi T, Watabe T, Kotake K, Kumazawa T, Aida T, Tanaka K, Ono R, Ishino F, Usami T, Miura T, Hirakata S, Kawasaki H, Tsugawa N, Yamada D, Hirayama K, Yoshikawa S, Karasuyama H, Okamoto R, Watanabe M, Blumberg RS, Adachi T. Immunoglobulin A-specific deficiency induces spontaneous inflammation specifically in the ileum. *Gut*. 2022 Mar;71(3):487-496.
21. Zegers BJ, van Loghem E, Out T, et al. Familial deficiency of immunoglobulin IgA2. *Monogr Allergy*. 1986;20:195-202.
22. Oliviero S, DeMarchi M, Bast BJ, Zegers BJ, van Loghem E, de Lange G, Carbonara O. Molecular analysis of a case of IgA2 deficiency. *J Immunogenet*. 1986 Feb;13(1):3-9. doi: 10.1111/j.1744-313x.1986.tb01077.x.
23. Bottaro A, De Marchi M, De Lange G, Boccazzi C, Caldesi F, Gallina R, Carbonara AO. New types of multiple and single gene deletions in the human IgCH locus. *Immunogenetics*. 1989;29(1):44-8. doi: 10.1007/BF02341612. Erratum in: *Immunogenetics* 1989;29(3):224

Figure S1

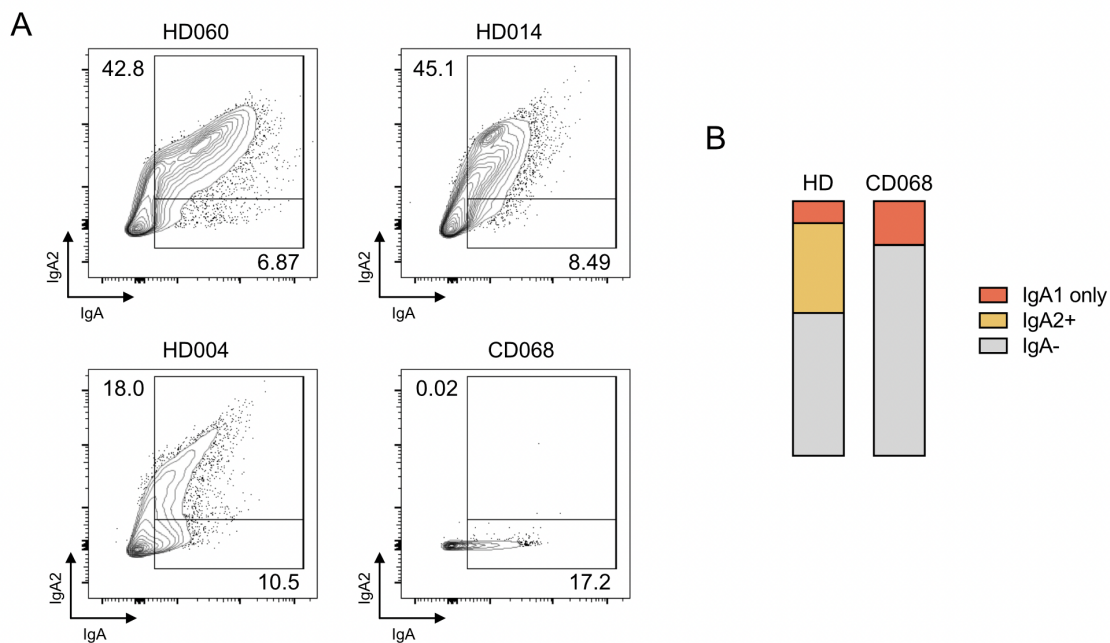

**Figure S1. Profile of IgA coating on fecal microbiota.** (A) Flow cytometric analysis of IgA<sup>+</sup> and IgA<sub>2</sub><sup>+</sup> microbiota from healthy donors and patient CD068. Cells were previously gated for SYBR green positivity. Frequency of IgA<sub>2</sub><sup>+</sup> and IgA<sub>1</sub> only are indicated. (B) Average proportions of IgA<sub>1</sub> only, IgA<sub>2</sub><sup>+</sup> and IgA<sup>-</sup> cells are indicated for HDs and patient CD068.

Figure S2

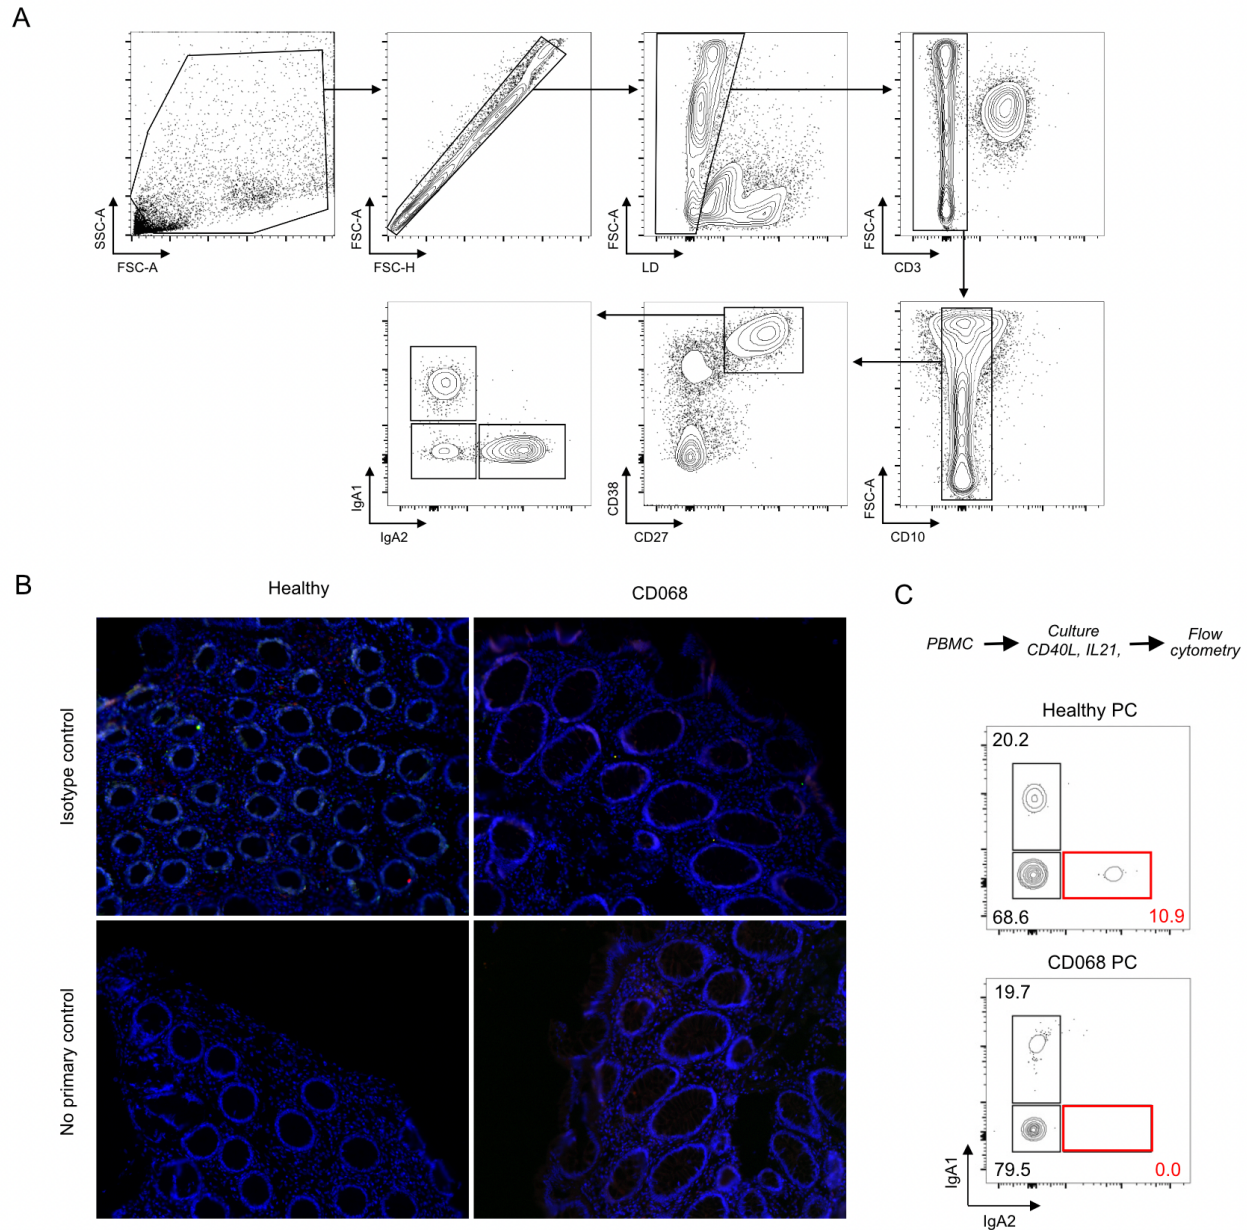

**Figure S2. Unknown B cell-intrinsic defect in a patient with selective IgA<sub>2</sub> deficiency associated with small intestinal CD.** (A) Gating strategy used to identify viable CD3<sup>+</sup>CD10<sup>+</sup>CD27<sup>+</sup>CD38<sup>high</sup> PCs within colonic lamina propria mononuclear cells. (B) Immunofluorescence analysis of isotype controls or non-primary IgA<sub>1</sub> and IgA<sub>2</sub> controls in colonic tissue sections from a representative HD (left) or patient CD068. (C) Flow cytometric staining of IgA<sub>1</sub> and IgA<sub>2</sub> on PCs from PBMCs stimulated *in vitro* for 10 days with CD40L and IL-21. PCs were gated as in (A).



**Table S1. Patient characteristics (where flow cytometry was performed)**

| Study number   | Gender<br>0-female<br>1-male | Age<br>range<br>(years) | Duration<br>of<br>Disease | Previous IBD<br>therapies                                         | Concomitant<br>IBD therapy | Comorbid<br>illnesses<br>(1 yes) | Non-IBD medications                                                                                                                                     | Disease extent                                            | Disease<br>behavior |
|----------------|------------------------------|-------------------------|---------------------------|-------------------------------------------------------------------|----------------------------|----------------------------------|---------------------------------------------------------------------------------------------------------------------------------------------------------|-----------------------------------------------------------|---------------------|
| IBDCD066       | 0                            | 41-45                   | 1 month                   | none                                                              | none                       | 1                                | ocrelizumab (MS), off for 1 year due to COVID                                                                                                           | L3                                                        | B1+perianal         |
| IBDCD067       | 0                            | 16-20                   | 2 years                   | none                                                              | none                       | 0                                | none                                                                                                                                                    | L1+L4                                                     | B1                  |
| IBDCD068       | 1                            | 36-40                   | 19 years                  | 5ASA, infliximab,<br>s/p ICR,<br>adalimumab                       | ustekinumab                | 0                                | none                                                                                                                                                    | L1+L4                                                     | B2                  |
| IBDCD070       | 1                            | 21-25                   | 6 months                  | none                                                              | none                       | 0                                | none                                                                                                                                                    | L1                                                        | B1                  |
| IBDCD072       | 1                            | 26-30                   | 1.5 years                 | none                                                              | ustekinumab                | 0                                | none                                                                                                                                                    | L1                                                        | B1                  |
| IBDCD078       | 1                            | 51-55                   | 32 years                  | steroids, s/p ICR,<br>and repeated SB<br>surgeries                | adalimumab                 | 1                                | lamotrigine, cariprazine, sumatriptan, atorvastatin, propranolol,<br>fenofibrate, eszopiclone, testosterone                                             | L3                                                        | B2                  |
| IBDCD079       | 1                            | 36-40                   | unknown                   | s/p ICR and<br>colostomy > stoma<br>reversal,                     | infliximab                 | 0                                | none                                                                                                                                                    | L3                                                        | B2                  |
| IBDUC103       | 1                            | 51-55                   | 18 years                  | 5ASA, steroids,<br>infliximab,<br>adalimumab, MTX,<br>vedolizumab | tofacitinib                | 1                                | statin, clopidogrel vitamin D                                                                                                                           | E2, currently on<br>remission                             |                     |
| IBDUC104       | 0                            | 76-80                   | 12 years                  | 6MP                                                               | 5ASA                       | 1                                | amlodipine, valsartan, thiazide, statin, montelukast cetirizine                                                                                         | E3, currently on<br>remission                             |                     |
| IBDUC108       | 1                            | 36-40                   | 4 years                   | prednisone                                                        | vedolizumab                | 1                                | atorvastatin, tamsulosin, PPI                                                                                                                           | E3, currently on<br>remission                             |                     |
| IBDUC114       | 0                            | 36-40                   | 8 years                   | none                                                              | infliximab                 | 0                                | none                                                                                                                                                    | E2, currently only mild<br>proctitis                      |                     |
| IBDUC120       | 1                            | 36-40                   | 1 year                    | steroids                                                          | 5ASA                       | 0                                | none                                                                                                                                                    | E3, active moderate-<br>severe in colon, the<br>rest mild |                     |
| IBDUC124       | 0                            | 31-35                   | 1 year                    | steroids 5ASA<br>vedolizumab                                      | infliximab                 | 1                                | rivaroxaban                                                                                                                                             | E3 pancolitis                                             |                     |
| IBDUC128       | 1                            | 51-55                   | 12 years                  | none                                                              | 5ASA                       | 0                                | none                                                                                                                                                    | E3 pancolitis                                             |                     |
| UC316          | 1                            | 31-35                   | 7 years                   | none                                                              | 5ASA                       | 0                                | none                                                                                                                                                    | E2                                                        |                     |
| IBD011<br>(UC) | 1                            | 21-25                   | 6 years                   | 5ASA, infliximab,<br>MTX                                          | infliximab                 | 0                                | none                                                                                                                                                    | left sided colitis (m/p<br>UC and not CD)                 |                     |
| NV126          | 1                            | 36-40                   |                           |                                                                   |                            | 0                                | none                                                                                                                                                    |                                                           |                     |
| NV127          | 1                            | 56-60                   |                           |                                                                   |                            | 1                                | losartan, thiazide, PPI (morbid obesity, OSA, HTN)                                                                                                      |                                                           |                     |
| NV128          | 1                            | 76-80                   |                           |                                                                   |                            | 1                                | aspirin, atorvastatin, losartan, thiazide, amlodipine (HTN, osteoarthritis,<br>gait disorder)                                                           |                                                           |                     |
| NV136          | 0                            | 61-65                   |                           |                                                                   |                            | 1                                | interferon beta1, metformin, sitagliptin, statin, losartan, aspirin (HTN<br>hyperlipidemia, multiple sclerosis, diabetes, s/p CRC and<br>hemicolectomy) |                                                           |                     |
| NV137          | 0                            | 51-55                   |                           |                                                                   |                            | 1                                | bupropion, levothyroxine, statin                                                                                                                        |                                                           |                     |
| NV138          | 0                            | 46-50                   |                           |                                                                   |                            | 0                                | none (s/p breast cancer)                                                                                                                                |                                                           |                     |
| NV139          | 1                            | 76-70                   |                           |                                                                   |                            | 1                                | atorvastatin, candesartan, metformin, tamsulosin, rivaroxaban,<br>gabapentin                                                                            |                                                           |                     |
| NV140          | 0                            | 46-50                   |                           |                                                                   |                            | 0                                | none                                                                                                                                                    |                                                           |                     |
| NV143          | 1                            | 46-50                   |                           |                                                                   |                            | 1                                | amlodipine, metformin, irbesartan, statin                                                                                                               |                                                           |                     |
| NV144          | 1                            | 16-20                   |                           |                                                                   |                            | 1                                | PPI (eosinophilic esophagitis)                                                                                                                          |                                                           |                     |
| NV146          | 0                            | 36-40                   |                           |                                                                   |                            | 0                                | none                                                                                                                                                    |                                                           |                     |
| NV147          | 0                            | 46-50                   |                           |                                                                   |                            | 1                                | benztropine, aripiprazole (autism)                                                                                                                      |                                                           |                     |
| NV148          | 1                            | 66-70                   |                           |                                                                   |                            | 0                                | aspirin preventive (no concomitant disease)                                                                                                             |                                                           |                     |
| NV168          | 1                            | 56-60                   |                           |                                                                   |                            | 1                                | PPI, atorvastatin, inhalers (dyslipidemia, GERD, OSA, COPD, prostate<br>cancer)                                                                         |                                                           |                     |
| NV192          | 1                            | 41-45                   |                           |                                                                   |                            | 0                                | none                                                                                                                                                    |                                                           |                     |
| NV193          | 0                            | 76-80                   |                           |                                                                   |                            | 1                                | aspirin, amlodipine, losartan, statin                                                                                                                   |                                                           |                     |
| NV195          | 0                            | 61-65                   |                           |                                                                   |                            | 1                                | lisinopril, amlodipine, statin, PPI, thyroxine                                                                                                          |                                                           |                     |
| NV196          | 0                            | 36-40                   |                           |                                                                   |                            | 0                                | none                                                                                                                                                    |                                                           |                     |
| NV197          | 0                            | 36-40                   |                           |                                                                   |                            | 0                                | s/p adenoid cystic carcinoma of hard palate 2018                                                                                                        |                                                           |                     |
| NV060          | 0                            | 46-50                   |                           |                                                                   |                            | 0                                | none                                                                                                                                                    |                                                           |                     |
| NV014          | 1                            | 41-45                   |                           |                                                                   |                            | 0                                | none                                                                                                                                                    |                                                           |                     |
| NV004          | 0                            | 26-30                   |                           |                                                                   |                            | 0                                | none                                                                                                                                                    |                                                           |                     |

**Table S1.** Abbreviations: 5ASA (5-aminosalicylic acid), s/p (status post), ICR (Ileocolonic resection), MTX (methotrexate), 6MP (mercaptopurine), PPI (proton pump inhibitor), OSA (obstructive sleep apnea), HTN (hypertension), CRC (colorectal cancer), GERD (gastroesophageal reflux disease), COPD (chronic obstructive pulmonary disease). All patient IDs are internal to our laboratory and are used only for purposes of this research project.

**Table S2. Patient characteristics (where plasma was used for immunoglobulin quantification)**

| Study number | Gender<br>0-female<br>1-male | Age<br>range<br>(years) | Duration of<br>Disease | Previous IBD therapies                                                                                                                                     | Concomitant<br>IBD therapy                  | Non-IBD medications                                                           | Disease extent                               | Disease behavior                   |
|--------------|------------------------------|-------------------------|------------------------|------------------------------------------------------------------------------------------------------------------------------------------------------------|---------------------------------------------|-------------------------------------------------------------------------------|----------------------------------------------|------------------------------------|
| IBDCD002     | 0                            | 46-50                   | 24 years               | MTX, steroids, 5ASA, antibiotics, s/p ICR, infliximab                                                                                                      | none (off meds<br>d/t pancreatic<br>cancer) | none                                                                          | L3+4                                         | B3                                 |
| IBDCD007     | 1                            | 41-45                   | 18 years               | 5ASA, s/p surgery (ICR, segmental sigmoidectomy and<br>takedown of vesical fistula), adalimumab, thiopurines, infliximab                                   | ustekinumab<br>(q4weeks)                    | none                                                                          | L3                                           | B3 + perianal fistula              |
| IBD011 (UC)  | 1                            | 21-25                   | 4 years                |                                                                                                                                                            | 5ASA                                        | none                                                                          | left sided colitis<br>(m/p UC and<br>not CD) |                                    |
| IBDCD012     | 1                            | 26-30                   | 4 years                | none                                                                                                                                                       | CDED nutrition,<br>no medical<br>therapy    | none                                                                          | L3                                           | inflammatory +<br>perianal fistula |
| IBDCD014     | 0                            | 51-55                   | 14 years               | s/p ICR, infliximab, adalimumab                                                                                                                            | vedolizumab                                 | levothyroxine, PPI                                                            | L3                                           | B3                                 |
| IBDCD015     | 1                            | 36-40                   | 24 years               | 5ASA, antibiotics, thiopurines, adalimumab, infliximab, previous<br>surgical therapies                                                                     | vedolizumab                                 | none                                                                          | L3                                           | B2 stricturing +<br>perianal       |
| IBDCD016     | 0                            | 46-50                   | 6 years                | 5ASA                                                                                                                                                       | 5ASA                                        | none                                                                          | L3                                           | B2 stricturing +<br>perianal       |
| IBDCD017     | 0                            | 31-35                   | 17 years               | s/p ileocectomy (X2), infliximab, adalimumab, ustekinumab                                                                                                  | none                                        | none                                                                          | L3                                           | penetrating                        |
| IBDCD020     | 0                            | 56-60                   | 50 years               |                                                                                                                                                            | thiopurines<br>+5ASA                        | PPI                                                                           | L2                                           | stricturing                        |
| IBDCD022     | 1                            | 31-35                   | 15 years               | surgery, certolizumab, infliximab, adalimumab, ustekinumab                                                                                                 | adalimumab                                  | none                                                                          | L1+L4                                        | Structuring + perianal             |
| IBDCD027     | 0                            | 41-45                   | 16 years               | 5ASA, vedolizumab                                                                                                                                          | infliximab                                  | none                                                                          | L3                                           | B1+perianal                        |
| IBDCD029     | 0                            | 46-50                   | 19years                | Surgery (right hemicolectomy, stoma and reversal)                                                                                                          | vedolizumab                                 | Lorazepam, simethicone                                                        | L3                                           | B3                                 |
| IBDCD030     | 0                            | 21-25                   | 14 years               | infliximab, adalimumab, 6MP, vedolizumab, MTX, 5ASA<br>antibiotics                                                                                         | prednisone                                  | PPI                                                                           | L2+L4 upper<br>duodenum                      | B1                                 |
| IBDCD032     | 1                            | 21-25                   | 22 years               | 5ASA                                                                                                                                                       | none                                        | finasteride                                                                   | L2                                           | B1                                 |
| IBDCD033     | 1                            | 31-35                   | 3 years                | s/p ICR and sigmoidectomy, 6MP, infliximab                                                                                                                 | ustekinumab                                 | none                                                                          | L2                                           | B3+perianal                        |
| IBDCD035     | 0                            | 66-70                   | 24years                | 5ASA, infliximab, s/p surgery (ileosigmoid fistula takedown,<br>ileocolic resection, right colon resection, jejunocolic<br>anastomosis, sigmoid resection) | adalimumab                                  | levetiracetam, lorazepam,<br>cholestyramine                                   | L3+4                                         | B3                                 |
| IBDCD037     | 1                            | 31-35                   | 22 years               | s/p ICR, 5ASA, 6MP, infliximab                                                                                                                             | adalimumab                                  | none                                                                          | L1                                           | B2                                 |
| IBDCD040     | 0                            | 61-65                   | 19 years               | 5asa                                                                                                                                                       | none                                        | risedronate                                                                   | L2                                           | B3+perianal                        |
| IBDCD041     | 1                            | 41-45                   | 6 years                | infliximab, 6MP, mongersen trial                                                                                                                           | ustekinumab                                 | losartan                                                                      | L3                                           | B1                                 |
| IBDCD042     | 0                            | 31-35                   | 6 years                | infliximab, adalimumab, vedolizumab and tofacitinib                                                                                                        | ustekinumab                                 | none                                                                          | L3                                           | B2                                 |
| IBDCD044     | 0                            | 36-40                   | 18 years               | 5ASA, azathioprine                                                                                                                                         | infliximab                                  | none                                                                          | L2                                           | B1+perianal                        |
| IBDCD056     | 1                            | 36-40                   | 7 years                | adalimumab                                                                                                                                                 | none                                        | none                                                                          | L2                                           | B2+perianal                        |
| IBDCD060     | 0                            | 31-35                   | 8 years                | s/p ICR                                                                                                                                                    | none                                        | none                                                                          | L3                                           | B2                                 |
| IBDCD061     | 0                            | 36-40                   | 2 years                | antibiotics, infliximab                                                                                                                                    | adalimumab                                  | lamotrigine                                                                   | L3                                           | B1+perianal                        |
| IBDCD062     | 1                            | 31-35                   | 20 years               | mesalamine, antibiotics, steroids, infliximab                                                                                                              | adalimumab                                  | tadalafil                                                                     | L3                                           | B2                                 |
| IBDUC001     | 0                            | 66-70                   | 25 years               | 5ASA, steroids                                                                                                                                             | vedolizumab                                 | amlodipine, raloxifene,<br>PPI                                                | E2 (now on<br>remission)                     |                                    |
| IBDUC036     | 0                            | 46-50                   | 1 year                 | none                                                                                                                                                       | 5ASA                                        | lamotrigine, levothyroxine,<br>aripiprazole                                   | E2                                           |                                    |
| IBDUC037     | 0                            | 61-65                   | 7 years                | 5ASA, steroids                                                                                                                                             | vedolizumab                                 | none                                                                          | E2                                           |                                    |
| IBDUC040     | 0                            | 31-35                   | 10 years               | steroids, infliximab, adalimumab, vedolizumab                                                                                                              | ustekinumab                                 | none                                                                          | E3                                           |                                    |
| IBDUC041     | 1                            | 51-55                   | 10 years               | 5ASA infliximab                                                                                                                                            | 5ASA                                        | metformin, insulin,<br>lisinopril                                             | E3                                           |                                    |
| IBDUC042     | 0                            | 21-25                   | 1 month                | none                                                                                                                                                       | steroids                                    | none                                                                          | E3                                           |                                    |
| IBDUC044     | 1                            | 36-40                   | 23 years               | 5ASA, adalimumab, infliximab, azathioprine, prednisone                                                                                                     | infliximab                                  | none                                                                          | E3                                           |                                    |
| IBDUC104     | 0                            | 76-80                   | 18 years               | 6MP, 5ASA                                                                                                                                                  | 5ASA                                        | Losartan,<br>hydrochlorothiazide,<br>atorvastatin, montelukast,<br>amlodipine | E3                                           |                                    |

**Table S2.** Abbreviations: MTX (methotrexate), 5ASA (5-aminosalicylic acid), s/p (status post), ICR (Ileocolonic resection), 6MP (mercaptopurine), CDED (Crohn's Disease Exclusion Diet), PPI (proton pump inhibitor), OSA (obstructive sleep apnea), HTN (hypertension), CRC (colorectal cancer), GERD (gastroesophageal reflux disease), COPD (chronic obstructive pulmonary disease). All patient IDs are internal to our laboratory and are used only for purposes of this research project.

**Table S3. Antibodies used in the study**

| <b>Flow cytometry</b>     |                     |                  |                  |              |
|---------------------------|---------------------|------------------|------------------|--------------|
| <b>Marker</b>             | <b>Fluorochrome</b> | <b>Supplier</b>  | <b>Catalog #</b> | <b>Clone</b> |
| CD19                      | PE Cy7              | Biolegend        | 363012           | SJ25C1       |
| CD27                      | PerCP Cy5.5         | Biolegend        | 302819           | O323         |
| CD10                      | APC Cy7             | Biolegend        | 312212           | HI10a        |
| CD38                      | APC                 | Biolegend        | 356606           | HB-7         |
| IgD                       | PB                  | Biolegend        | 348223           | IA6-2        |
| IgM                       | AF700               | Biolegend        | 314538           | MHM-88       |
| CD45                      | PE Dazzle 594       | Biolegend        | 304052           | HI30         |
| CD3                       | BV605               | Biolegend        | 300460           | UCHT1        |
| IgA1                      | A488                | Southern Biotech | 9130-30          | B3506B4      |
| IgA2                      | PE                  | Miltenyi         | 130-100-316      | IS11-21E11   |
| <b>Immunofluorescence</b> |                     |                  |                  |              |
| <b>Marker</b>             | <b>Fluorochrome</b> | <b>Supplier</b>  | <b>Catalog #</b> | <b>Clone</b> |
| rabbit anti-human IgA1    | pure                | Abcam            | ab193187         | RM124        |
| mouse anti-human IgA2     | pure                | Miltenyi         | 130-093-081      | IS11-21E11   |
| goat anti-human IgA       | pure                | Abcam            | ab98550          | polyclonal   |
| goat anti-mouse           | AF594               | Abcam            | ab150116         | polyclonal   |
| goat anti-rabbit          | AF488               | Abcam            | ab150077         | polyclonal   |
| donkey anti-goat          | AF594               | Abcam            | ab150132         | polyclonal   |
| donkey anti-rabbit        | AF488               | Abcam            | ab150073         | polyclonal   |
